# Supplementary material
Source: PubMed Central journal article supplement (PMC9765597)
Supplement: mbio.02540-22-s0004.pdf [file mbio.02540-22-s0004.pdf]

1 Table S1. Hemagglutination inhibition, neutralization assay, and viral shedding results for all experiments.

| Virus      | Replicate | DI         |           |          |            |                                  | RC1        |           |          |            |                                  | RC2        |           |          |            |                                  |
|------------|-----------|------------|-----------|----------|------------|----------------------------------|------------|-----------|----------|------------|----------------------------------|------------|-----------|----------|------------|----------------------------------|
|            |           | Animal No. | HAI Titer | MN Titer | Shed Virus | Defined as Infected <sup>a</sup> | Animal No. | HAI Titer | MN Titer | Shed Virus | Defined as Infected <sup>a</sup> | Animal No. | HAI Titer | MN Titer | Shed Virus | Defined as Infected <sup>a</sup> |
| H1N1 pdm09 | 1         | 5456       | 640       | 403      | Yes        | Yes                              | 5458       | 320       | 16       | No         | Yes                              |            |           |          |            | n/a                              |
|            | 2         | 6361       | 320       | 160      | Yes        | Yes                              | 6362       | 2560      | 453      | Yes        | Yes                              | 6363       | 5120      | 640      | Yes        | Yes                              |
|            | 3         | 6364       | 640       | 806      | Yes        | Yes                              | 6365       | 2560      | 320      | Yes        | Yes                              | 6366       | 5120      | 254      | Yes        | Yes                              |
|            | 4         | 6382       | 1280      | 1016     | Yes        | Yes                              | 6383       | 2560      | 905      | Yes        | Yes                              | 6384       | 5120      | 508      | Yes        | Yes                              |
|            | 5         | 6385       | 1280      | 1016     | Yes        | Yes                              | 6386       | 10240     | 453      | Yes        | Yes                              | 6388       | 5120      | 905      | Yes        | Yes                              |
|            | 6         | 6389       | 1280      | 2560     | Yes        | Yes                              | 6390       | 10240     | 1280     | Yes        | Yes                              | 6391       | 2560      | 1016     | Yes        | Yes                              |
| H7N9       | 1         | 7090       | 320       | 160      | Yes        | Yes                              | 7091       | 40        | <10      | No         | No                               |            |           |          |            | n/a                              |
|            | 2         | 7094       | 320       | 320      | Yes        | Yes                              | 7095       | <10       | <10      | No         | No                               |            |           |          |            | n/a                              |
|            | 3         | 7097       | 320       | 113      | Yes        | Yes                              | 7098       | 40        | 25       | No         | Yes                              |            |           |          |            | n/a                              |
|            | 4         | 6811       | 160       | 202      | Yes        | Yes                              | 7077       | 320       | 80       | Yes        | Yes                              | 7092       | 320       | 40       | Yes        | Yes                              |
|            | 5         | ARC 1196   | 80        | 80       | Yes        | Yes                              | ARC 1197   | 160       | 63       | Yes        | Yes                              | 7096       | 160       | 40       | Yes        | Yes                              |
|            | 6         | 7078       | 160       | 160      | Yes        | Yes                              | 7080       | 160       | 226      | Yes        | Yes                              | 7081       | <10       | <10      | No         | No                               |
| H3N2       | 1         | 9291       | 1280      | 2032     | Yes        | Yes                              | 9292       | 640       | 2032     | Yes        | Yes                              | 9293       | 1280      | 5120     | Yes        | Yes                              |
|            | 2         | 9297       | 1280      | 3225     | Yes        | Yes                              | 9298       | 640       | 2560     | Yes        | Yes                              | 9299       | <10       | <10      | No         | No                               |
|            | 3         | 9306       | 1280      | >5120    | Yes        | Yes                              | 9307       | 640       | 2560     | Yes        | Yes                              | 9308       | 2560      | 3620     | Yes        | Yes                              |
|            | 4         | 9309       | 640       | 1810     | Yes        | Yes                              | 9310       | 1280      | 4064     | Yes        | Yes                              | 9311       | 1280      | 4064     | Yes        | Yes                              |
|            | 5         | 9314       | 640       | 2032     | Yes        | Yes                              | 9315       | <10       | <10      | No         | No                               | 9316       | <10       | <10      | No         | No                               |
| H3N8       | 1         | A8701      | 320       | 640      | Yes        | Yes                              | A8702      | <10       | <10      | No         | No                               | A8703      | <10       | <10      | No         | No                               |
|            | 2         | A8704      | 640       | 1016     | Yes        | Yes                              | A8705      | 640       | 1810     | Yes        | Yes                              | A8706      | 320       | 508      | Yes        | Yes                              |
|            | 3         | A8707      | 640       | 1016     | Yes        | Yes                              | A8708      | 640       | 1016     | Yes        | Yes                              | A8709      | 320       | 905      | Yes        | Yes                              |
|            | 4         | A8712      | 320       | 640      | Yes        | Yes                              | A8713      | 320       | 254      | Yes        | Yes                              | A8714      | 160       | 254      | Yes        | Yes                              |
|            | 5         | A8251      | 320       | 453      | Yes        | Yes                              | A8252      | 320       | 905      | Yes        | Yes                              | A8253      | <10       | <10      | No         | No                               |
|            | 6         | A7717      | 320       | 905      | Yes        | Yes                              | A8258      | 640       | 2032     | Yes        | Yes                              | A8285      | 160       | 508      | Yes        | Yes                              |

2 Notes:

3 Grey boxes denote RC2 was not introduced (H1N1 and H7N9 studies) or RC2 was housed with an RC1 that did not  
4 become virus positive by antigen test strip or q-RT-PCR (H3N2 and H3N8).

5 Underline denotes RC1 ferrets that did not become virus positive by antigen test strip or q-RT-PCR, but were moved 2  
6 days after the last RC1 ferret became positive in other replicates.

7 <sup>a</sup> Animals were defined as infected if virus was cultured from the nasal wash and/or animals had reciprocal titers >10 for  
8 both hemagglutination inhibition (HI) and microneutralization assays (MN).

9
