# Supplementary material
Source: PubMed Central journal article supplement (PMC9765597)
Supplement: mbio.02540-22-s0006.pdf [file mbio.02540-22-s0006.pdf]

Table S3. List of All Non-Synonymous and Synonymous Mutations Identified During Sequential Transmission Experiments with A/Anhui/1/2013 (H7N9)

| Gene Segment                                               | Nucleotide Change | Amino Acid Change Relative to Inoculum [(for HA, (H3 numbering)] | Nucleotide Frequencing |                                          |     |       |                                          |     |      |                                          |     |       |                                         |       |        |                                            |        |       |                                                  |       |     |
|------------------------------------------------------------|-------------------|------------------------------------------------------------------|------------------------|------------------------------------------|-----|-------|------------------------------------------|-----|------|------------------------------------------|-----|-------|-----------------------------------------|-------|--------|--------------------------------------------|--------|-------|--------------------------------------------------|-------|-----|
|                                                            |                   |                                                                  | Virus Inoculum         | Trio 1: DI 7090 - no transmission to RC1 |     |       | Trio 2: DI 7094 - no transmission to RC1 |     |      | Trio 3: DI 7097 - no transmission to RC1 |     |       | Trio 4: DI 6811 -> RC1 7077 -> RC2 7092 |       |        | Trio 5: DI ARC1196 -> RC1 1197 -> RC2 7096 |        |       | Trio 6: DI 7078 -> RC1 7080 - no transmission to |       |     |
|                                                            |                   |                                                                  |                        | DI                                       | RC1 | RC2   | DI                                       | RC1 | RC2  | DI                                       | RC1 | RC2   | DI                                      | RC1   | RC2    | DI                                         | RC1    | RC2   | DI                                               | RC1   | RC2 |
| <b>H7N9 Amino Acid Mutations/ Non-Synonymous Mutations</b> |                   |                                                                  |                        |                                          |     |       |                                          |     |      |                                          |     |       |                                         |       |        |                                            |        |       |                                                  |       |     |
| PB2                                                        | G293A             | W98*                                                             |                        | 31.18                                    |     |       | 68.38                                    |     |      | 10.70                                    |     |       | 11.26                                   |       |        | 11.88                                      |        |       | 19.28                                            |       |     |
| PB2                                                        | A1172C            | E391A                                                            |                        |                                          |     |       |                                          |     |      |                                          |     |       |                                         |       |        |                                            |        | 9.13  |                                                  |       |     |
| PB2                                                        | G1699A            | D567N                                                            |                        |                                          |     |       |                                          |     |      |                                          |     | 5.74  |                                         |       |        |                                            |        |       |                                                  |       |     |
| PB2                                                        | A1757G            | K586R                                                            |                        |                                          |     |       |                                          |     |      |                                          |     |       |                                         |       |        |                                            |        |       | 11.04                                            |       |     |
| PB2                                                        | A2132G            | N711S                                                            |                        |                                          |     |       |                                          |     |      |                                          |     |       |                                         |       |        | 14.75                                      | 99.54  | 99.33 |                                                  |       |     |
| PB2                                                        | G2141A            | S714N                                                            |                        |                                          |     |       |                                          |     |      |                                          |     |       |                                         |       | 13.00  | 99.48                                      | 98.39  |       |                                                  |       |     |
| PB1                                                        | C413T             | P138L                                                            |                        |                                          |     |       |                                          |     |      |                                          |     |       |                                         | 91.09 | 99.53  |                                            |        |       |                                                  |       |     |
| PB1                                                        | G632A             | R211K                                                            |                        |                                          |     | 10.16 |                                          |     |      |                                          |     |       |                                         |       |        |                                            |        |       |                                                  |       |     |
| PB1                                                        | G769A             | A257T                                                            |                        |                                          |     | 7.51  |                                          |     |      |                                          |     |       |                                         |       |        |                                            |        |       |                                                  |       |     |
| PB1                                                        | T1309C            | W437R                                                            |                        |                                          |     |       |                                          |     |      |                                          |     |       |                                         |       |        |                                            |        | 12.76 |                                                  |       |     |
| PB1                                                        | G2197A            | G733R                                                            |                        |                                          |     |       |                                          |     | 5.71 |                                          |     |       |                                         |       |        |                                            |        |       |                                                  |       |     |
| PA                                                         | C812A             | P271H                                                            |                        |                                          |     |       |                                          |     |      |                                          |     |       |                                         |       |        |                                            |        |       |                                                  | 13.33 |     |
| PA                                                         | G1027A            | A343T                                                            |                        |                                          |     | 8.13  |                                          |     |      |                                          |     |       |                                         |       |        |                                            |        |       |                                                  | 84.84 |     |
| PA                                                         | G1039A            | D347N                                                            |                        |                                          |     | 9.65  |                                          |     |      |                                          |     |       |                                         |       |        |                                            |        |       |                                                  | 83.92 |     |
| PA                                                         | A1046G            | E349G                                                            |                        |                                          |     |       |                                          |     |      |                                          |     |       |                                         |       |        |                                            |        |       |                                                  | 79.83 |     |
| PA                                                         | A1172G            | K391R                                                            |                        |                                          |     |       |                                          |     |      | 7.26                                     |     |       |                                         |       |        |                                            |        |       |                                                  |       |     |
| PA                                                         | A1226G            | N409S                                                            |                        | 7.52                                     |     |       | 6.50                                     |     |      | 7.53                                     |     |       | 10.28                                   | 99.80 | 100.00 | 12.01                                      |        |       | 7.85                                             |       |     |
| PA                                                         | G1342A            | A448T                                                            |                        |                                          |     |       | 5.52                                     |     |      |                                          |     |       |                                         |       |        |                                            |        |       |                                                  |       |     |
| PA                                                         | G1660A            | V554I                                                            |                        |                                          |     |       | 6.90                                     |     |      |                                          |     |       |                                         |       |        |                                            |        |       |                                                  |       |     |
| PA                                                         | T1718C            | I573T                                                            |                        |                                          |     |       | 6.16                                     |     |      |                                          |     |       |                                         |       |        |                                            |        |       |                                                  |       |     |
| PA                                                         | C1858T            | P620S                                                            |                        | 9.27                                     |     |       |                                          |     |      | 7.94                                     |     |       |                                         |       |        |                                            |        |       |                                                  |       |     |
| PA                                                         | G1867A            | E623K                                                            |                        | 10.26                                    |     |       |                                          |     |      | 7.64                                     |     |       |                                         |       |        | 10.15                                      |        |       | 9.25                                             |       |     |
| PA                                                         | A2063G            | E688G                                                            |                        |                                          |     |       |                                          |     |      |                                          |     |       |                                         |       |        |                                            |        |       | 5.86                                             |       |     |
| HA                                                         | G199A             | V67I (59)                                                        |                        |                                          |     |       | 7.55                                     |     |      |                                          |     |       |                                         |       |        |                                            |        |       |                                                  |       |     |
| HA                                                         | A421G             | N141D (133)                                                      | 47.37                  | 43.27                                    |     |       | 51.98                                    |     |      | 54.53                                    |     |       | 42.16                                   | 98.38 | 99.41  | 49.78                                      | 99.80  | 99.79 | 47.40                                            | 5.10  |     |
| HA                                                         | G427A             | A143T (135)                                                      | 12.55                  | 11.06                                    |     |       | 8.78                                     |     |      | 6.46                                     |     |       | 7.50                                    |       |        | 8.46                                       |        |       | 13.70                                            |       |     |
| HA                                                         | G452A             | G151E (144)                                                      |                        | 9.79                                     |     |       | 11.14                                    |     |      | 5.96                                     |     |       | 10.53                                   |       |        | 8.13                                       |        |       | 5.95                                             | 68.03 |     |
| HA                                                         | G499A             | D167N (158)                                                      | 31.59                  | 36.72                                    |     |       | 41.31                                    |     |      | 28.73                                    |     |       | 38.22                                   |       |        | 28.18                                      |        |       | 30.34                                            | 94.82 |     |
| HA                                                         | G641A             | G214E (205)                                                      | 6.46                   |                                          |     |       | 1.04                                     |     |      |                                          |     |       |                                         |       |        |                                            |        |       |                                                  |       |     |
| HA                                                         | C683A             | A228E (219)                                                      |                        |                                          |     |       |                                          |     |      |                                          |     |       |                                         |       |        |                                            |        |       |                                                  | 25.94 |     |
| HA                                                         | T704A*            | L235Q* (226)                                                     |                        | 21.10                                    |     |       | 32.13                                    |     |      | 25.97                                    |     |       | 26.68                                   | 99.11 | 98.89  | 23.73                                      | 99.55  | 98.64 | 9.91                                             |       |     |
| HA                                                         | T1544C            | V515A (505)                                                      | 6.56                   | 10.66                                    |     |       | 9.79                                     |     |      | 11.14                                    |     |       | 10.79                                   |       |        | 6.11                                       |        |       | 5.95                                             |       |     |
| NP                                                         | G350A             | R117K                                                            |                        |                                          |     |       | 5.22                                     |     |      |                                          |     |       |                                         |       |        |                                            |        |       |                                                  |       |     |
| NP                                                         | G850A             | A284T                                                            | 7.14                   |                                          |     |       |                                          |     |      |                                          |     |       | 8.52                                    |       |        | 5.49                                       |        |       |                                                  |       |     |
| NP                                                         | G1117A            | A373T                                                            | 13.99                  | 20.20                                    |     |       | 11.25                                    |     |      | 23.57                                    |     |       | 17.84                                   |       |        | 20.01                                      |        |       | 14.32                                            |       |     |
| NP                                                         | C1289A            | T430K                                                            |                        |                                          |     |       |                                          |     |      |                                          |     |       |                                         |       |        |                                            |        |       |                                                  | 5.11  |     |
| NA                                                         | C29T              | T10I                                                             |                        |                                          |     |       |                                          |     |      |                                          |     |       |                                         | 99.17 | 99.55  |                                            |        |       |                                                  | 13.93 |     |
| NA                                                         | C38T              | T13I                                                             |                        |                                          |     |       |                                          |     |      |                                          |     |       |                                         |       |        |                                            |        |       |                                                  |       |     |
| NA                                                         | A844G             | T282A                                                            |                        |                                          |     |       |                                          |     |      |                                          |     |       |                                         |       |        | 5.94                                       |        |       |                                                  |       |     |
| NA                                                         | A1379G            | K460R                                                            |                        |                                          |     |       |                                          |     |      |                                          |     |       |                                         |       |        | 99.30                                      | 100.00 |       |                                                  |       |     |
| NA                                                         | A1195T            | S399C                                                            |                        |                                          |     |       |                                          |     |      | 8.40                                     |     |       |                                         |       |        |                                            |        |       |                                                  |       |     |
| MP                                                         | A977G             | E326G                                                            |                        |                                          |     |       | 8.66                                     |     |      |                                          |     |       |                                         |       |        |                                            |        |       |                                                  |       |     |
| NS                                                         | G133A             | G45R                                                             | 5.22                   |                                          |     |       |                                          |     |      |                                          |     |       |                                         |       |        |                                            |        |       |                                                  |       |     |
| <b>H7N9 Synonymous Mutations</b>                           |                   |                                                                  |                        |                                          |     |       |                                          |     |      |                                          |     |       |                                         |       |        |                                            |        |       |                                                  |       |     |
| PB2                                                        | C93T              | I31                                                              | 8.88                   |                                          |     |       | 40.97                                    |     |      |                                          |     | 11.46 |                                         |       |        | 9.95                                       |        |       | 12.23                                            | 51.15 |     |
| PB2                                                        | C990T             | F330                                                             | 19.20                  | 18.26                                    |     |       | 17.07                                    |     |      |                                          |     | 24.77 |                                         |       |        | 20.36                                      |        |       | 23.17                                            |       |     |
| PB2                                                        | A1077G            | G359                                                             |                        |                                          |     |       |                                          |     |      |                                          |     | 6.01  |                                         |       |        |                                            |        |       |                                                  |       |     |
| PB2                                                        | G1083A            | E361                                                             | 9.11                   | 10.50                                    |     |       | 8.01                                     |     |      |                                          |     | 9.59  |                                         |       |        | 9.59                                       |        |       | 9.96                                             |       |     |
| PB2                                                        | C1134T            | T378                                                             | 5.35                   | 8.26                                     |     |       |                                          |     |      |                                          |     |       |                                         |       |        |                                            |        |       | 6.06                                             |       |     |
| PB2                                                        | C1290T            | P430                                                             | 10.20                  |                                          |     |       | 6.25                                     |     |      |                                          |     | 11.54 |                                         |       |        | 14.33                                      |        |       | 15.35                                            |       |     |

|     |        |            |       |       |  |       |  |       |  |       |       |       |       |       |       |
|-----|--------|------------|-------|-------|--|-------|--|-------|--|-------|-------|-------|-------|-------|-------|
| PB2 | G1329A | K443       | 6.02  |       |  | 5.75  |  | 9.35  |  | 9.39  |       | 8.51  |       | 10.62 |       |
| PB2 | C1333T | L445       |       |       |  | 14.00 |  |       |  |       |       |       |       | 87.21 |       |
| PB2 | C1359T | P453       |       |       |  | 7.87  |  |       |  |       |       |       |       |       |       |
| PB2 | C1819T | L607       | 16.11 | 16.12 |  |       |  | 24.95 |  | 20.21 |       | 22.05 |       | 15.75 |       |
| PB2 | C2142T | S714       |       | 10.30 |  |       |  |       |  |       |       |       |       |       |       |
| PB1 | T183C  | T61        |       |       |  |       |  |       |  |       |       | 7.86  |       |       |       |
| PB1 | C297T  | H99        |       |       |  |       |  |       |  |       |       |       | 99.22 | 99.76 |       |
| PB1 | T693A  | A231       |       |       |  |       |  |       |  |       |       | 11.02 |       |       |       |
| PB1 | A750G  | G250       |       |       |  |       |  |       |  |       |       |       |       | 8.52  |       |
| PB1 | T1944C | A648       |       |       |  | 8.82  |  |       |  |       |       |       |       |       |       |
| PB1 | G1968A | E656       |       |       |  |       |  |       |  |       |       |       |       | 82.73 |       |
| PA  | C39T   | I13        |       |       |  |       |  | 6.22  |  |       |       |       |       |       |       |
| PA  | C156T  | H52        | 8.29  | 4.74  |  | 19.90 |  | 4.79  |  | 7.17  |       | 10.30 |       | 19.78 |       |
| PA  | G216A  | L72        | 5.07  | 8.38  |  |       |  |       |  |       |       | 9.28  |       | 12.90 |       |
| PA  | C325T  | L109       |       |       |  |       |  | 5.22  |  |       |       |       |       |       |       |
| PA  | G879A  | E293       |       |       |  |       |  |       |  |       | 99.26 | 99.28 |       |       |       |
| PA  | C888T  | S296       | 5.20  | 7.96  |  |       |  | 7.54  |  |       |       |       |       | 8.22  |       |
| PA  | C1005T | L335       |       |       |  |       |  |       |  | 6.30  |       |       |       |       |       |
| PA  | C1497T | N499       |       |       |  |       |  |       |  | 6.37  |       |       |       |       |       |
| PA  | G1812A | E604       |       |       |  |       |  |       |  |       | 95.13 | 97.20 |       |       |       |
| PA  | A1830G | E610       |       |       |  |       |  | 13.22 |  |       |       |       |       |       |       |
| PA  | T1875C | P625       |       |       |  |       |  |       |  |       |       | 5.23  |       |       |       |
| PA  | G1884A | V628       |       | 5.99  |  |       |  |       |  | 7.04  |       |       |       | 23.35 | 8.33  |
| PA  | T2022C | D674       | 5.59  |       |  | 15.12 |  | 6.54  |  |       |       |       |       | 5.90  | 18.85 |
| HA  | C96T   | T32 (24)   | 7.76  | 5.54  |  | 7.56  |  |       |  |       |       |       |       | 5.01  | 5.14  |
| HA  | C1197T | N399 (389) |       | 5.26  |  | 8.85  |  |       |  | 9.59  |       |       |       | 6.60  |       |
| HA  | G1326A | E396 (386) |       |       |  |       |  |       |  |       | 79.05 | 87.35 |       |       |       |
| HA  | G1401A | E467 (457) |       |       |  | 8.63  |  |       |  | 10.29 |       |       |       |       |       |
| HA  | C1554T | S518 (508) | 9.79  | 7.52  |  | 8.35  |  |       |  | 5.84  |       |       |       | 7.06  | 12.89 |
| NP  | G885A  | G295       |       |       |  |       |  |       |  |       |       |       |       | 7.59  |       |
| NP  | C912T  | F304       |       |       |  |       |  |       |  |       |       |       |       |       |       |
| NP  | G1071A | Q357       | 13.88 | 22.09 |  |       |  | 25.79 |  | 19.32 |       |       |       | 20.66 | 16.28 |
| NP  | C1072T | L358       |       |       |  |       |  |       |  |       |       |       |       | 5.41  |       |
| NP  | C1125T | D375       |       |       |  |       |  |       |  |       |       |       |       |       |       |
| NP  | C1252T | N417       | 8.40  |       |  | 6.67  |  | 11.00 |  |       |       |       |       |       | 5.05  |
| NA  | G117A  | P39        |       |       |  |       |  | 6.48  |  |       |       |       |       |       |       |
| NA  | C825T  | C275       |       | 9.41  |  |       |  | 7.49  |  | 5.80  |       | 8.65  | 99.76 | 99.52 | 10.70 |
| NA  | C1065T | N355       |       |       |  |       |  |       |  | 5.85  |       |       |       |       |       |
| MP  | A297G  | L99        |       |       |  | 6.14  |  |       |  |       |       |       |       |       |       |
| MP  | C762T  | A254       |       |       |  | 5.22  |  |       |  |       |       |       |       |       |       |
| NS  | C154T  | L52        | 17.36 | 18.56 |  | 14.87 |  | 16.42 |  | 17.79 |       | 17.16 |       | 17.07 | 84.72 |

Notes:

Displayed are mutations detected at a frequency  $\geq 5\%$

HA number is displayed relative to start codon of H7, H3 numbering is indicated in parentheses

Red text denotes mutations that became enriched in multiple trios of ferrets

\*Mutation was present in inoculum at less than 5% (2.26%)
