# Supplementary material
Source: PubMed Central journal article supplement (PMC9765597)
Supplement: mbio.02540-22-s0007.pdf [file mbio.02540-22-s0007.pdf]

Table S4. List of All Non-Synonymous and Synonymous Mutations Identified During Sequential Transmission Experiments with A/Texas/50/2012(H3N2)

| Gene Segment                                               | Nucleotide Change | Amino Acid Change Relative to Inoculum [for HA, (H3 numbering)] | Nucleotide Frequencing |                                      |       |       |                                                     |     |     |                                       |       |     |                                       |     |     |                                          |       |
|------------------------------------------------------------|-------------------|-----------------------------------------------------------------|------------------------|--------------------------------------|-------|-------|-----------------------------------------------------|-----|-----|---------------------------------------|-------|-----|---------------------------------------|-----|-----|------------------------------------------|-------|
|                                                            |                   |                                                                 | Nucleotide Frequencing |                                      |       |       |                                                     |     |     |                                       |       |     |                                       |     |     |                                          |       |
|                                                            |                   |                                                                 | Virus Inoculum         | Trio 1: DI 9291->RC1 9292-> RC2 9293 |       |       | Trio 2: DI 9297-> RC1 9298-> no transmission to RC2 |     |     | Trio 3: DI 9306-> RC1 9307-> RC2 9308 |       |     | Trio 4: DI 9309-> RC1 9310-> RC2 9311 |     |     | Trio 5: DI 9314-> no transmission to RC1 |       |
| DI                                                         | RC1               | RC2                                                             |                        | DI                                   | RC1   | RC2   | DI                                                  | RC1 | RC2 | DI                                    | RC1   | RC2 | DI                                    | RC1 | RC2 |                                          |       |
| <b>H3N2 Amino Acid Mutations/ Non-Synonymous Mutations</b> |                   |                                                                 |                        |                                      |       |       |                                                     |     |     |                                       |       |     |                                       |     |     |                                          |       |
| PB2                                                        | C47G              | T16S                                                            |                        |                                      |       |       |                                                     |     |     |                                       |       |     | 10.61                                 |     |     |                                          |       |
| PB2                                                        | G85A              | A29T                                                            |                        |                                      |       |       |                                                     |     |     |                                       |       |     | 7.34                                  |     |     |                                          |       |
| PB2                                                        | A124G             | N42D                                                            |                        |                                      |       |       |                                                     |     |     | 11.01                                 |       |     |                                       |     |     |                                          |       |
| PB2                                                        | A148G             | M50V                                                            |                        |                                      |       |       |                                                     |     |     |                                       | 71.01 |     |                                       |     |     |                                          |       |
| PB2                                                        | C176A             | A59D                                                            |                        |                                      |       |       |                                                     |     |     |                                       |       |     |                                       |     |     | 24.92                                    |       |
| PB2                                                        | G297T             | W99C                                                            |                        |                                      |       |       |                                                     |     |     |                                       |       |     |                                       |     |     |                                          |       |
| PB1                                                        | T305C             | I102T                                                           |                        | 7.54                                 | 7.98  |       |                                                     |     |     |                                       |       |     |                                       |     |     |                                          |       |
| PB1                                                        | G1978A            | V660I                                                           |                        |                                      |       |       |                                                     |     |     | 41.06                                 |       |     |                                       |     |     |                                          |       |
| PB1                                                        | A2213G            | E738G                                                           |                        |                                      |       |       |                                                     |     |     |                                       |       |     |                                       |     |     |                                          |       |
| PB1                                                        | A2270G            | K657R                                                           |                        |                                      |       |       |                                                     |     |     |                                       |       |     | 10.56                                 |     |     |                                          | 35.77 |
| PA                                                         | G224A             | R75K                                                            |                        |                                      |       |       |                                                     |     |     |                                       |       |     |                                       |     |     |                                          |       |
| PA                                                         | G892A             | E298K                                                           |                        |                                      |       |       |                                                     |     |     | 9.58                                  |       |     |                                       |     |     |                                          |       |
| PA                                                         | G1135A            | V379I                                                           |                        |                                      |       |       |                                                     |     |     |                                       |       |     |                                       |     |     |                                          |       |
| PA                                                         | G1882A            | V628M                                                           |                        |                                      |       |       |                                                     |     |     |                                       |       |     |                                       |     |     |                                          | 6.24  |
| PA                                                         | T1894C            | S632P                                                           |                        |                                      |       |       |                                                     |     |     |                                       |       |     |                                       |     |     |                                          |       |
| HA                                                         | A123G             | I41M (25)                                                       |                        |                                      |       |       |                                                     |     |     |                                       |       |     |                                       |     |     |                                          |       |
| HA                                                         | G460T             | A154S (138)                                                     |                        |                                      | 46.99 |       |                                                     |     |     |                                       |       |     |                                       |     |     |                                          |       |
| HA                                                         | C516A             | H172Q (156)                                                     |                        |                                      |       |       |                                                     |     |     |                                       |       |     |                                       |     |     |                                          |       |
| HA                                                         | C543A             | N181K (165)                                                     |                        |                                      | 19.47 |       |                                                     |     |     |                                       |       |     |                                       |     |     |                                          |       |
| HA                                                         | T626A             | F209Y (193)                                                     |                        |                                      | 8.44  |       |                                                     |     |     |                                       |       |     |                                       |     |     |                                          |       |
| HA                                                         | T725A             | I242N (226)                                                     | 38.13                  | 52.93                                |       |       |                                                     |     |     |                                       |       |     |                                       |     |     |                                          |       |
| HA                                                         | G1321A            | A441T (425)                                                     |                        |                                      |       | 18.85 |                                                     |     |     |                                       |       |     |                                       |     |     |                                          |       |
| NP                                                         | G707A             | R236K                                                           |                        | 10.96                                |       |       |                                                     |     |     |                                       |       |     |                                       |     |     |                                          |       |
| NP                                                         | G1122A            | M374I                                                           |                        |                                      |       |       |                                                     |     |     |                                       |       |     |                                       |     |     |                                          |       |
| NP                                                         | A1150G            | R384G                                                           |                        |                                      |       |       |                                                     |     |     |                                       |       |     |                                       |     |     |                                          |       |
| NA                                                         | A16T              | K6*                                                             |                        |                                      | 21.74 |       |                                                     |     |     |                                       |       |     |                                       |     |     |                                          |       |
| NA                                                         | C95T              | T32I                                                            |                        |                                      |       |       |                                                     |     |     | 100                                   |       |     |                                       |     |     |                                          |       |
| NA                                                         | G451A             | D151N                                                           |                        |                                      |       | 5.53  |                                                     |     |     |                                       |       |     |                                       |     |     |                                          |       |
| NA                                                         | T1097A            | I366N                                                           |                        |                                      | 8.1   |       |                                                     |     |     |                                       |       |     |                                       |     |     |                                          |       |
| NA                                                         | G1135T            | V379F                                                           |                        |                                      | 7.49  |       |                                                     |     |     |                                       |       |     |                                       |     |     |                                          |       |
| NA                                                         | T1162G            | S388A                                                           |                        | 27.15                                |       |       |                                                     |     |     |                                       |       |     |                                       |     |     |                                          |       |
| NA                                                         | G1283A            | R428K                                                           |                        |                                      |       |       |                                                     |     |     |                                       |       |     |                                       |     |     |                                          | 73.89 |
| NS                                                         | C254T             | P85L                                                            |                        |                                      |       |       |                                                     |     |     |                                       |       |     |                                       |     |     |                                          | 17.39 |
| NS                                                         | A796C             | S266R                                                           |                        | 6.02                                 | 91.56 | 100   | 8.43                                                |     |     | 6.32                                  |       |     |                                       |     |     |                                          | 11.83 |
| <b>H3N2 Synonymous Mutations</b>                           |                   |                                                                 |                        |                                      |       |       |                                                     |     |     |                                       |       |     |                                       |     |     |                                          |       |
| PB2                                                        | G1482A            | V494                                                            |                        | 7.5                                  |       |       |                                                     |     |     |                                       |       |     |                                       |     |     |                                          |       |
| PB2                                                        | C2067T            | A689                                                            |                        |                                      | 74.31 | 99.78 |                                                     |     |     |                                       |       |     |                                       |     |     |                                          |       |
| PB1                                                        | C588A             | T196                                                            |                        |                                      |       |       |                                                     |     |     |                                       |       |     | 14.42                                 |     |     |                                          |       |
| PB1                                                        | G1161A            | K387                                                            |                        |                                      | 19.73 |       |                                                     |     |     |                                       |       |     |                                       |     |     |                                          |       |
| PB1                                                        | C2143T            | L415                                                            |                        |                                      | 96.54 | 99.77 |                                                     |     |     |                                       |       |     |                                       |     |     |                                          |       |
| PB1                                                        | G1806A            | R602                                                            |                        |                                      |       |       |                                                     |     |     | 25.11                                 |       |     |                                       |     |     |                                          |       |
| PB1                                                        | T1875C            | C625                                                            |                        |                                      |       |       | 6.14                                                |     |     |                                       |       |     |                                       |     |     |                                          |       |
| PB1                                                        | C2016T            | R672                                                            |                        |                                      |       |       |                                                     |     |     |                                       | 9.57  |     |                                       |     |     |                                          |       |

|     |        |            |       |  |       |        |  |      |      |  |  |       |      |      |  |      |  |
|-----|--------|------------|-------|--|-------|--------|--|------|------|--|--|-------|------|------|--|------|--|
| PB1 | A2181G | R727       |       |  |       |        |  |      |      |  |  |       |      |      |  |      |  |
| PA  | G1551A | V517       |       |  |       |        |  |      |      |  |  |       |      |      |  |      |  |
| HA  | G795A  | G265 (249) |       |  |       |        |  |      |      |  |  |       |      |      |  |      |  |
| NP  | T141A  | L47        | 6.86  |  | 97.07 | 100.00 |  |      |      |  |  |       |      |      |  |      |  |
| NP  | T141C  | L47        |       |  |       |        |  |      |      |  |  |       |      |      |  |      |  |
| NP  | G447A  | Q149       |       |  |       |        |  | 5.41 |      |  |  | 22.99 |      |      |  |      |  |
| NP  | C558A  | I186       | 18.45 |  |       |        |  |      |      |  |  |       |      |      |  |      |  |
| NP  | G1065A | R355       |       |  |       |        |  | 6.48 |      |  |  |       |      |      |  |      |  |
| NS  | A93T   | P31        |       |  |       | 100.00 |  |      |      |  |  |       |      |      |  |      |  |
| NS  | C150T  | L50        |       |  |       |        |  |      |      |  |  |       | 5.40 |      |  |      |  |
| NS  | T204C  | I68        |       |  |       |        |  |      | 9.09 |  |  |       |      |      |  |      |  |
| NS  | G324A  | K108       |       |  |       |        |  |      |      |  |  |       | 6.00 |      |  |      |  |
|     |        |            |       |  |       |        |  |      |      |  |  |       |      | 5.58 |  | 7.30 |  |

Notes:  
Displayed are mutations detected at a frequency  $\geq$  5%
