# Supplementary material
Source: PubMed Central journal article supplement (PMC9765597)
Supplement: mbio.02540-22-s0008.pdf [file mbio.02540-22-s0008.pdf]

Table S5. List of All Non-Synonymous and Synonymous Mutations Identified During Sequential Transmission Experiments with A/harbor seal/New Hampshire/179629/2011 (H3N8)

| Gene Segment                                               | Nucleotide Change | Amino Acid Change Relative to Inoculum (for HA, (H3 numbering)) | Nucleotide Frequencing |                                         |     |     |                                          |       |       |                                          |        |       |                                          |       |        |                                                     |     |        |                                        |        |       |       |       |
|------------------------------------------------------------|-------------------|-----------------------------------------------------------------|------------------------|-----------------------------------------|-----|-----|------------------------------------------|-------|-------|------------------------------------------|--------|-------|------------------------------------------|-------|--------|-----------------------------------------------------|-----|--------|----------------------------------------|--------|-------|-------|-------|
|                                                            |                   |                                                                 | Virus Inoculum         | Trio 1: DI 8701->no transmission to RC1 |     |     | Trio 2: DI A8704-> RC1 A8705-> RC2 A8706 |       |       | Trio 3: DI A8707-> RC1 A8708-> RC2 A8709 |        |       | Trio 4: DI A8712-> RC1 A8713-> RC2 A8714 |       |        | Trio 5: DI 8251-> RC1 8252-> no transmission to RC2 |     |        | Trio 6: DI A7717-> RC1 8258-> RC2 8285 |        |       |       |       |
|                                                            |                   |                                                                 |                        | DI                                      | RC1 | RC2 | DI                                       | RC1   | RC2   | DI                                       | RC1    | RC2   | DI                                       | RC1   | RC2    | DI                                                  | RC1 | RC2    | DI                                     | RC1    | RC2   |       |       |
| <b>H3N8 Amino Acid Mutations/ Non-Synonymous Mutations</b> |                   |                                                                 |                        |                                         |     |     |                                          |       |       |                                          |        |       |                                          |       |        |                                                     |     |        |                                        |        |       |       |       |
| PB2                                                        | G2218A            | D740N                                                           | 9.76                   | 12.61                                   |     |     | 9.91                                     |       |       | 5.86                                     |        |       | 8.24                                     |       |        |                                                     |     |        | 9.07                                   |        |       | 8.08  | 9.38  |
| PB1                                                        | A1130G            | D377G                                                           |                        |                                         |     |     |                                          |       |       |                                          |        |       |                                          |       |        |                                                     |     |        |                                        |        |       |       |       |
| PB1                                                        | T2028G            | N676K                                                           |                        | 17.28                                   |     |     | 13.30                                    |       |       | 10.07                                    |        |       |                                          | 25.54 |        |                                                     |     | 90.46  | 16.45                                  |        | 11.55 |       |       |
| PB1                                                        | C2030G            | T677R                                                           |                        |                                         |     |     |                                          |       |       |                                          |        |       |                                          |       |        |                                                     |     | 7.41   |                                        |        |       |       |       |
| PA                                                         | G253A             | A85T                                                            |                        |                                         |     |     |                                          |       |       |                                          | 7.82   |       |                                          |       |        |                                                     |     |        |                                        |        |       |       |       |
| PA                                                         | T923C             | I308T                                                           | 5.11                   |                                         |     |     | 9.26                                     |       |       |                                          |        |       |                                          | 5.85  |        |                                                     |     |        |                                        |        | 6.57  |       |       |
| PA                                                         | G1184A            | S395N                                                           |                        |                                         |     |     |                                          |       |       |                                          |        |       |                                          |       |        |                                                     |     |        | 99.05                                  |        |       |       |       |
| HA                                                         | G175A             | V59I (43)                                                       |                        |                                         |     |     |                                          |       |       | 5.79                                     |        |       |                                          |       |        |                                                     |     |        |                                        |        |       |       |       |
| HA                                                         | G433A             | G145R (129)                                                     |                        |                                         |     |     |                                          |       |       |                                          |        |       |                                          |       |        |                                                     |     | 100.00 | 99.55                                  |        |       |       |       |
| HA                                                         | G460A             | A154T (138)                                                     |                        |                                         |     |     |                                          | 98.64 | 77.29 |                                          |        |       |                                          |       |        |                                                     |     |        |                                        |        |       | 53.47 |       |
| HA                                                         | G460T             | A154S (138)                                                     | 10.43                  | 33.93                                   |     |     | 46.34                                    |       |       | 44.63                                    |        |       |                                          | 58.02 |        |                                                     |     |        | 30.18                                  |        | 28.84 |       |       |
| HA                                                         | A563G             | D188G (172)                                                     |                        |                                         |     |     |                                          |       |       |                                          | 9.59   |       |                                          |       |        |                                                     |     |        |                                        |        |       |       |       |
| HA                                                         | G668A             | R223K (207)                                                     | 29.48                  | 14.73                                   |     |     | 13.04                                    |       |       | 9.43                                     |        |       |                                          | 3.69  | 97.66  | 98.16                                               |     | 11.38  | 98.97                                  |        | 10.50 |       |       |
| HA                                                         | A725G             | Q242R (226)                                                     |                        |                                         |     |     |                                          |       |       |                                          |        |       |                                          |       |        |                                                     |     |        |                                        |        |       |       | 99.39 |
| HA                                                         | A778G             | M260V (244)                                                     |                        |                                         |     |     |                                          | 21.60 |       |                                          |        |       |                                          |       |        |                                                     |     |        |                                        |        |       |       |       |
| NP                                                         | C1202T            | A401V                                                           |                        |                                         |     |     |                                          |       |       |                                          |        |       |                                          |       |        |                                                     |     |        |                                        |        |       |       | 11.02 |
| NA                                                         | C352T             | P118S                                                           | 37.53                  | 37.40                                   |     |     | 31.98                                    | 82.73 |       | 35.13                                    | 100.00 | 98.61 |                                          | 46.61 |        |                                                     |     |        | 33.95                                  |        | 28.68 | 86.22 | 98.92 |
| NA                                                         | T958C             | S320P                                                           | 18.96                  | 16.74                                   |     |     | 23.94                                    |       |       | 22.10                                    |        |       |                                          | 19.59 |        |                                                     |     |        | 21.56                                  |        | 20.04 |       |       |
| NA                                                         | A1160T            | Q387L                                                           |                        |                                         |     |     |                                          |       |       | 5.13                                     |        |       |                                          |       |        |                                                     |     |        |                                        |        |       |       |       |
| NA                                                         | G1180A            | V394I                                                           | 35.14                  | 40.82                                   |     |     | 47.38                                    | 15.71 | 93.81 | 40.00                                    |        |       |                                          | 42.41 | 100.00 | 99.77                                               |     | 32.91  | 99.77                                  |        | 46.54 | 9.68  |       |
| <b>H3N8 Synonymous Mutations</b>                           |                   |                                                                 |                        |                                         |     |     |                                          |       |       |                                          |        |       |                                          |       |        |                                                     |     |        |                                        |        |       |       |       |
| PB2                                                        | A90C              | I30                                                             |                        |                                         |     |     |                                          |       |       | 6.73                                     |        |       |                                          |       |        |                                                     |     |        | 6.33                                   |        |       |       |       |
| PB2                                                        | G99A              | K33                                                             |                        |                                         |     |     |                                          |       |       | 92.18                                    |        |       |                                          |       |        |                                                     |     |        |                                        |        |       |       |       |
| PB2                                                        | C1044T            | N348                                                            |                        |                                         |     |     |                                          | 79.20 |       | 96.94                                    |        |       |                                          |       |        |                                                     |     |        |                                        |        |       |       |       |
| PB2                                                        | G1797A            | L599                                                            |                        |                                         |     |     |                                          |       |       |                                          |        |       |                                          |       |        |                                                     |     |        |                                        |        |       |       |       |
| PB2                                                        | A2193G            | V731                                                            | 5.32                   | 5.12                                    |     |     | 6.35                                     |       |       | 5.41                                     |        |       |                                          | 6.66  |        |                                                     |     |        |                                        |        |       | 5.71  |       |
| PB1                                                        | G255A             | T85                                                             |                        |                                         |     |     |                                          | 81.71 |       |                                          |        |       |                                          |       |        |                                                     |     |        |                                        |        |       |       |       |
| PB1                                                        | G414A             | P138                                                            |                        |                                         |     |     |                                          |       |       |                                          |        |       |                                          |       |        |                                                     |     |        |                                        |        |       |       |       |
| PB1                                                        | C813T             | L271                                                            |                        |                                         |     |     |                                          | 78.38 | 6.23  |                                          |        |       |                                          |       |        |                                                     |     |        |                                        |        |       |       |       |
| PB1                                                        | C1117T            | L373                                                            |                        |                                         |     |     |                                          |       |       |                                          |        |       |                                          |       |        |                                                     |     |        |                                        |        |       |       |       |
| PB1                                                        | T1800C            | N600                                                            |                        |                                         |     |     |                                          |       |       |                                          |        |       |                                          |       |        |                                                     |     |        |                                        |        |       |       |       |
| PA                                                         | A132G             | V44                                                             | 9.47                   | 12.19                                   |     |     | 7.23                                     | 6.94  |       | 11.51                                    |        |       |                                          | 5.05  |        |                                                     |     |        | 8.09                                   |        | 8.63  |       |       |
| PA                                                         | A147G             | S49                                                             |                        |                                         |     |     |                                          |       |       |                                          |        |       |                                          | 9.45  |        |                                                     |     |        |                                        |        |       |       |       |
| PA                                                         | A660G             | P220                                                            |                        |                                         |     |     |                                          | 14.54 | 95.65 |                                          |        |       |                                          |       |        |                                                     |     |        |                                        |        |       |       |       |
| PA                                                         | G1851A            | E617                                                            |                        |                                         |     |     | 6.63                                     |       |       |                                          |        |       |                                          |       |        |                                                     |     |        |                                        |        |       |       |       |
| HA                                                         | A432G             | T144 (128)                                                      |                        |                                         |     |     |                                          |       |       | 7.80                                     |        |       |                                          |       |        |                                                     |     |        |                                        |        |       |       |       |
| NP                                                         | G531A             | G177                                                            |                        |                                         |     |     |                                          |       |       |                                          |        |       |                                          |       |        |                                                     |     |        |                                        | 100.00 |       |       |       |
| NP                                                         | A702G             | A234                                                            |                        |                                         |     |     |                                          |       |       |                                          |        |       | 5.96                                     |       |        |                                                     |     |        |                                        |        |       |       |       |
| NS                                                         | T240C             | T80                                                             |                        |                                         |     |     |                                          |       |       |                                          |        |       |                                          |       |        |                                                     |     |        |                                        |        |       |       | 15.71 |

Notes:

Displayed are mutations detected at a frequency  $\geq 5\%$

HA number is displayed relative to start codon of H3, H3 numbering is indicated in parentheses

Red text denotes mutations that became enriched in multiple trios of ferrets

PB2: At position 27 reference has G and Inoculum has A. No aa change.
