# Supplementary material
Source: PubMed Central journal article supplement (PMC9765597)
Supplement: mbio.02540-22-s0009.pdf [file mbio.02540-22-s0009.pdf]

Table S6. Summary of mutations in antigenic sites of the HA and NA during sequential transmission

| Protein          | Nucleotide Change | Amino Acid Change Relative to Inoculum (for HA, (H3 numbering)) | Virus Inoculum | Nucleotide Frequencing |      |     |                              |       |     |                              |     |     |                              |       |        |                              |       |       |                              |       |       |
|------------------|-------------------|-----------------------------------------------------------------|----------------|------------------------|------|-----|------------------------------|-------|-----|------------------------------|-----|-----|------------------------------|-------|--------|------------------------------|-------|-------|------------------------------|-------|-------|
|                  |                   |                                                                 |                | Trio 1: DI 5456        |      |     | Trio 2: DI 6361-RC1 6362-RC2 |       |     | Trio 3: DI 6364-RC1 6365-RC2 |     |     | Trio 4: DI 6382-RC1 6383-RC2 |       |        | Trio 5: DI 6385-RC1 6386-RC2 |       |       | Trio 6: DI 6389-RC1 6390-RC2 |       |       |
|                  |                   |                                                                 |                | DI                     | RC1  | RC2 | DI                           | RC1   | RC2 | DI                           | RC1 | RC2 | DI                           | RC1   | RC2    | DI                           | RC1   | RC2   | DI                           | RC1   | RC2   |
| <b>H1N1pdm09</b> |                   |                                                                 |                |                        |      |     |                              |       |     |                              |     |     |                              |       |        |                              |       |       |                              |       |       |
| HA               | A424G             | N142D (129)                                                     | 25.31          |                        |      |     |                              |       |     |                              |     |     |                              |       |        |                              |       |       |                              |       |       |
| HA               | G719A             | R240Q (226)                                                     |                | 93.29                  |      |     | 94.84                        | 100   | 100 | 94.39                        | 100 | 100 | 96.5                         | 100   | 100    | 97.35                        | 100   | 99.79 | 97.78                        | 100   | 99.79 |
| <b>H3N2</b>      |                   |                                                                 |                |                        |      |     |                              |       |     |                              |     |     |                              |       |        |                              |       |       |                              |       |       |
| HA               | C516A             | H172Q (156)                                                     |                |                        |      |     | 8.38                         |       |     |                              |     |     |                              |       |        | 13.6                         |       |       |                              |       |       |
| HA               | T626A             | F209Y (193)                                                     |                |                        | 8.44 |     |                              |       |     |                              |     |     |                              |       |        |                              |       |       |                              |       |       |
| HA               | T725A             | I242N (226)                                                     | 38.13          | 52.93                  |      |     | 36.23                        | 98.62 |     |                              |     |     |                              |       |        | 9.18                         |       |       |                              |       |       |
| <b>H3N8</b>      |                   |                                                                 |                |                        |      |     |                              |       |     |                              |     |     |                              |       |        |                              |       |       |                              |       |       |
| HA               | G433A             | G145R (129)                                                     |                |                        |      |     |                              |       |     |                              |     |     |                              |       | 100.00 | 99.55                        |       |       |                              |       |       |
| HA               | A725G             | Q242R (226)                                                     |                |                        |      |     |                              |       |     |                              |     |     |                              |       |        |                              |       |       |                              | 99.39 |       |
| <b>H7N9</b>      |                   |                                                                 |                |                        |      |     |                              |       |     |                              |     |     |                              |       |        |                              |       |       |                              |       |       |
| HA               | G452A             | G151E (133)                                                     | 4.38           | 9.79                   |      |     | 11.14                        |       |     | 5.96                         |     |     | 10.53                        |       |        | 8.13                         |       |       | 5.95                         | 68.03 |       |
| HA               | G499A             | D167N (158)                                                     | 31.59          | 36.72                  |      |     | 41.31                        |       |     | 28.73                        |     |     | 38.22                        |       |        | 28.18                        |       |       | 30.34                        | 94.82 |       |
| HA               | T704A             | L235Q (226)                                                     |                | 21.10                  |      |     | 32.13                        |       |     | 25.97                        |     |     | 26.68                        | 99.11 | 98.89  | 23.73                        | 99.55 | 98.64 | 9.91                         |       |       |

Notes:

No antigenic changes were observed in NA for any of the viruses.

Grey shading denotes the animal did not become infected.

For H3N2, the last trio of ferrets was removed from all analyses as the RC1 had a false positive antigen test (see discussion).
