# Supplementary material
Source: PubMed Central journal article supplement (PMC9765597)

# Changes in HA at Nucleotide cutoff Frequency of 50%

## H1N1

### DI

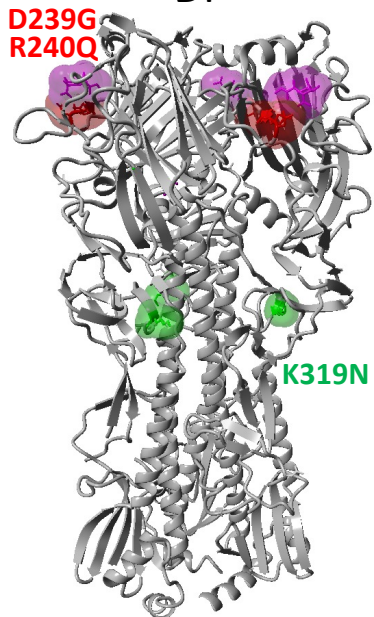

### RC1

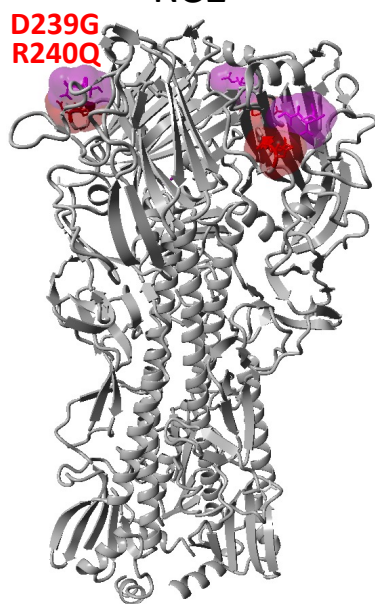

### RC2

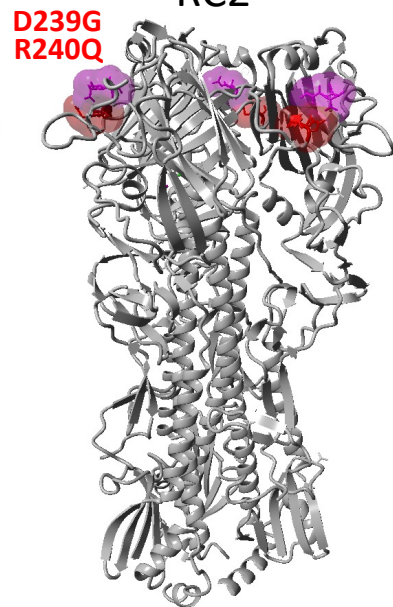

## H3N2

### DI

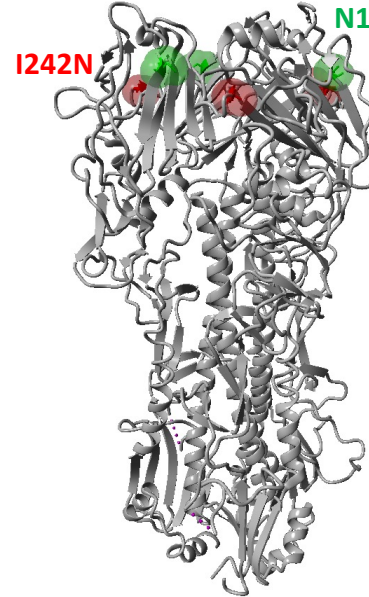

### RC1

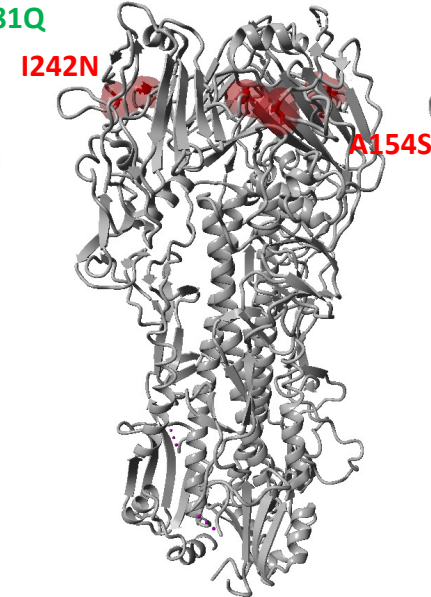

### RC2

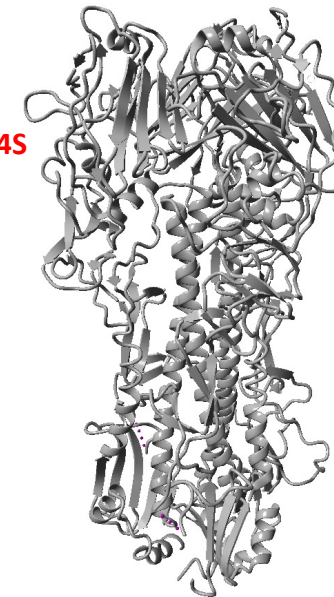

## H3N8

### DI

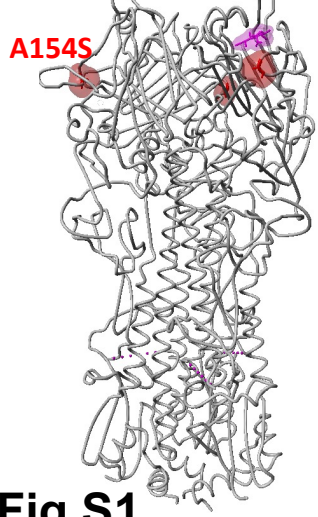

### RC1

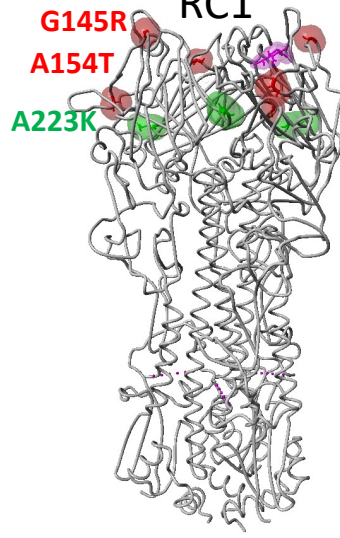

### RC2

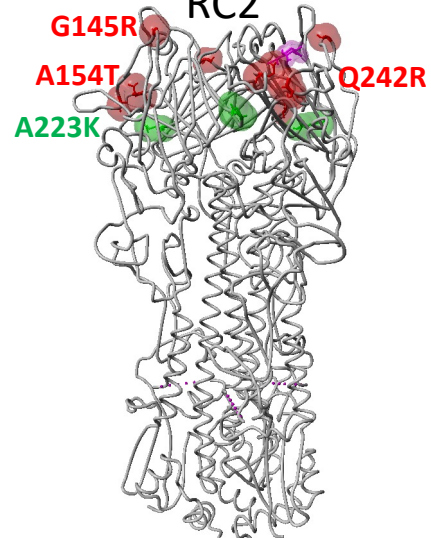

## H7N9

### DI

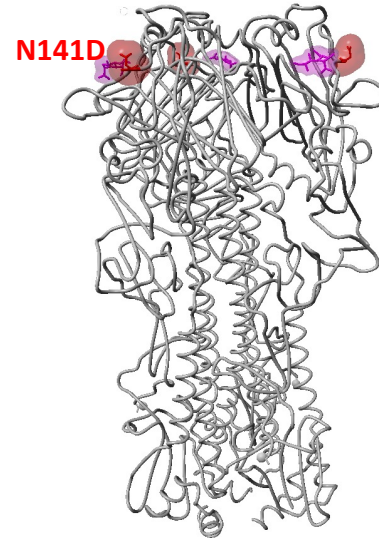

### RC1

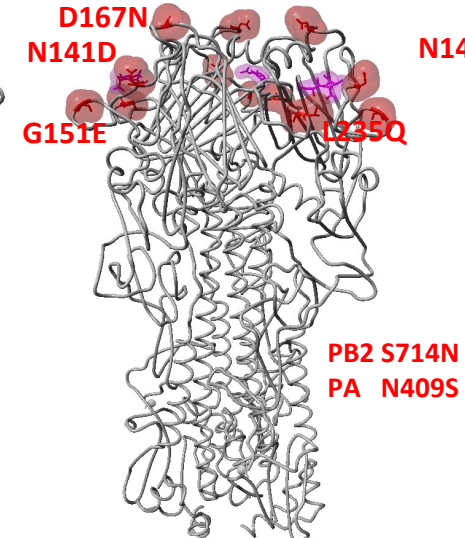

### RC2

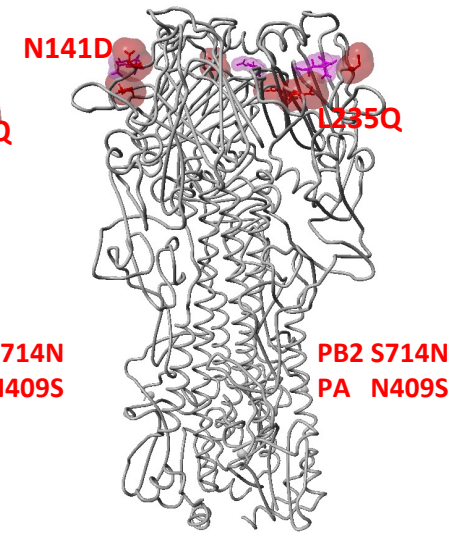

Fig S1

Supplement: mbio.02540-22-s0001.pdf [file mbio.02540-22-s0001.pdf]

# Changes in HA at Nucleotide cutoff Frequency of 25%

## H1N1

### DI

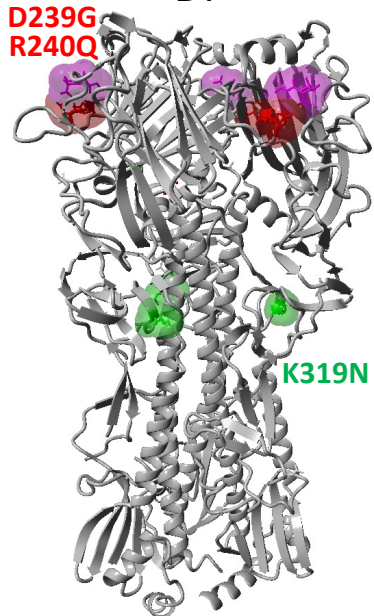

### RC1

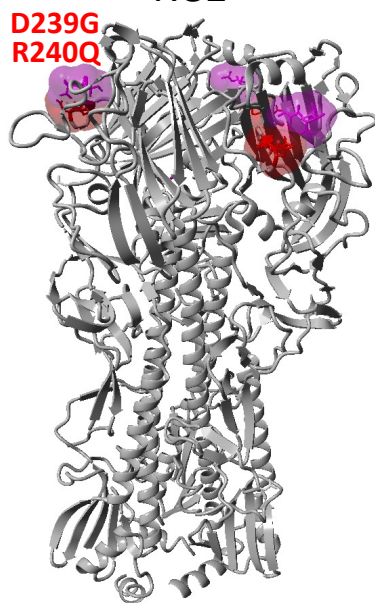

### RC2

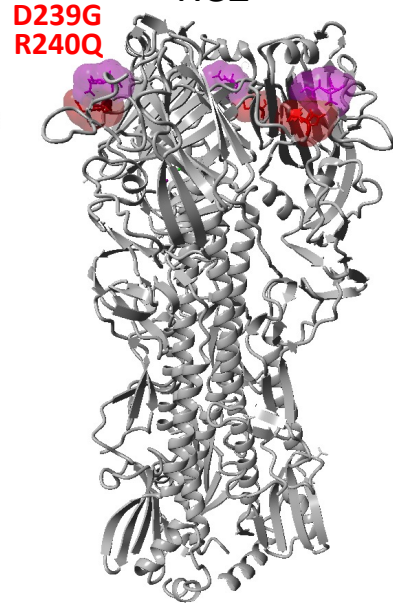

## H3N2

### DI

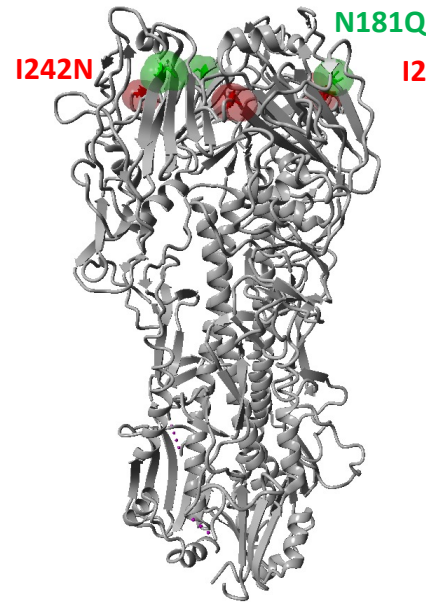

### RC1

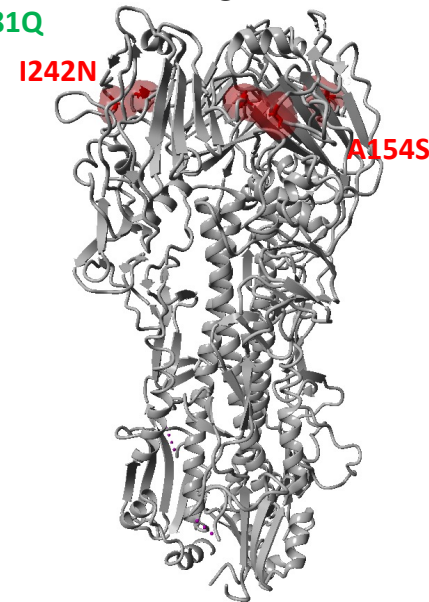

### RC2

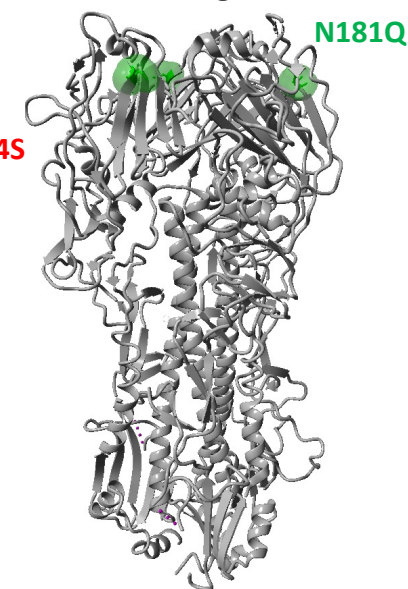

## H3N8

### DI

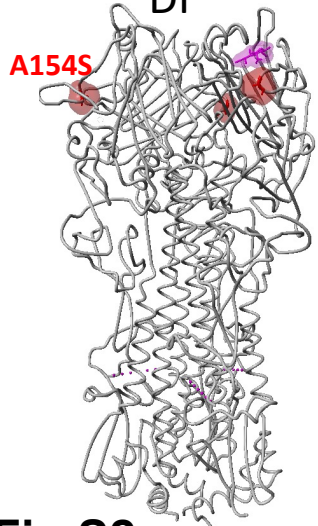

### RC1

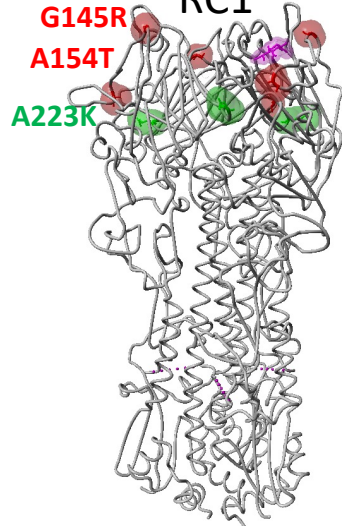

### RC2

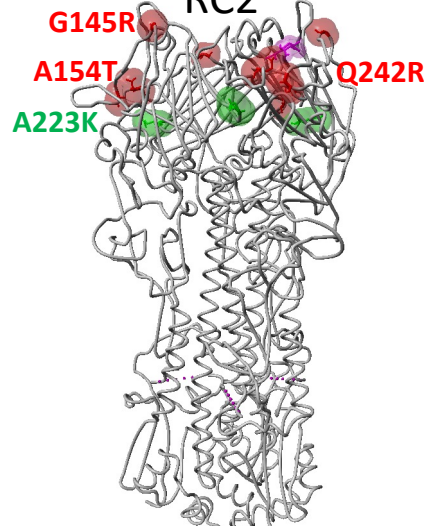

## H7N9

### DI

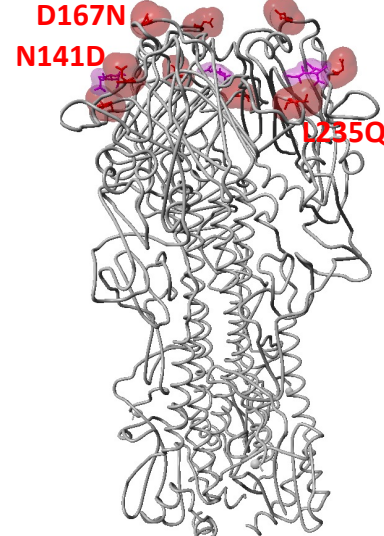

### RC1

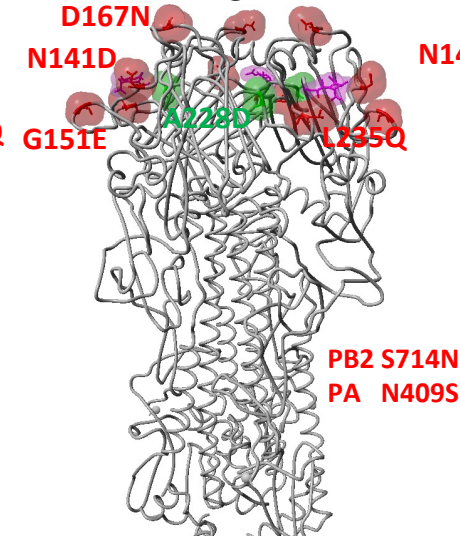

### RC2

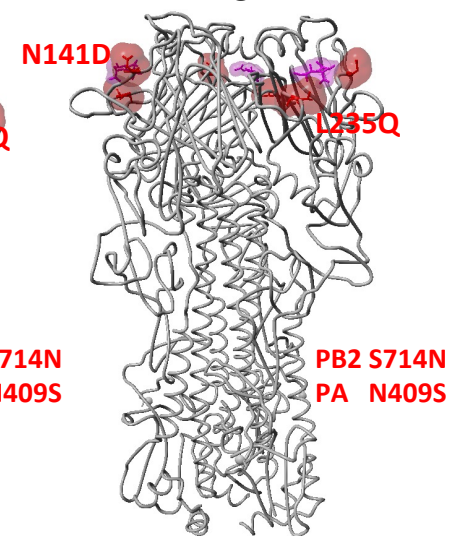

Fig S2

Supplement: mbio.02540-22-s0002.pdf [file mbio.02540-22-s0002.pdf]

# Changes in HA at Nucleotide cutoff Frequency of 10%

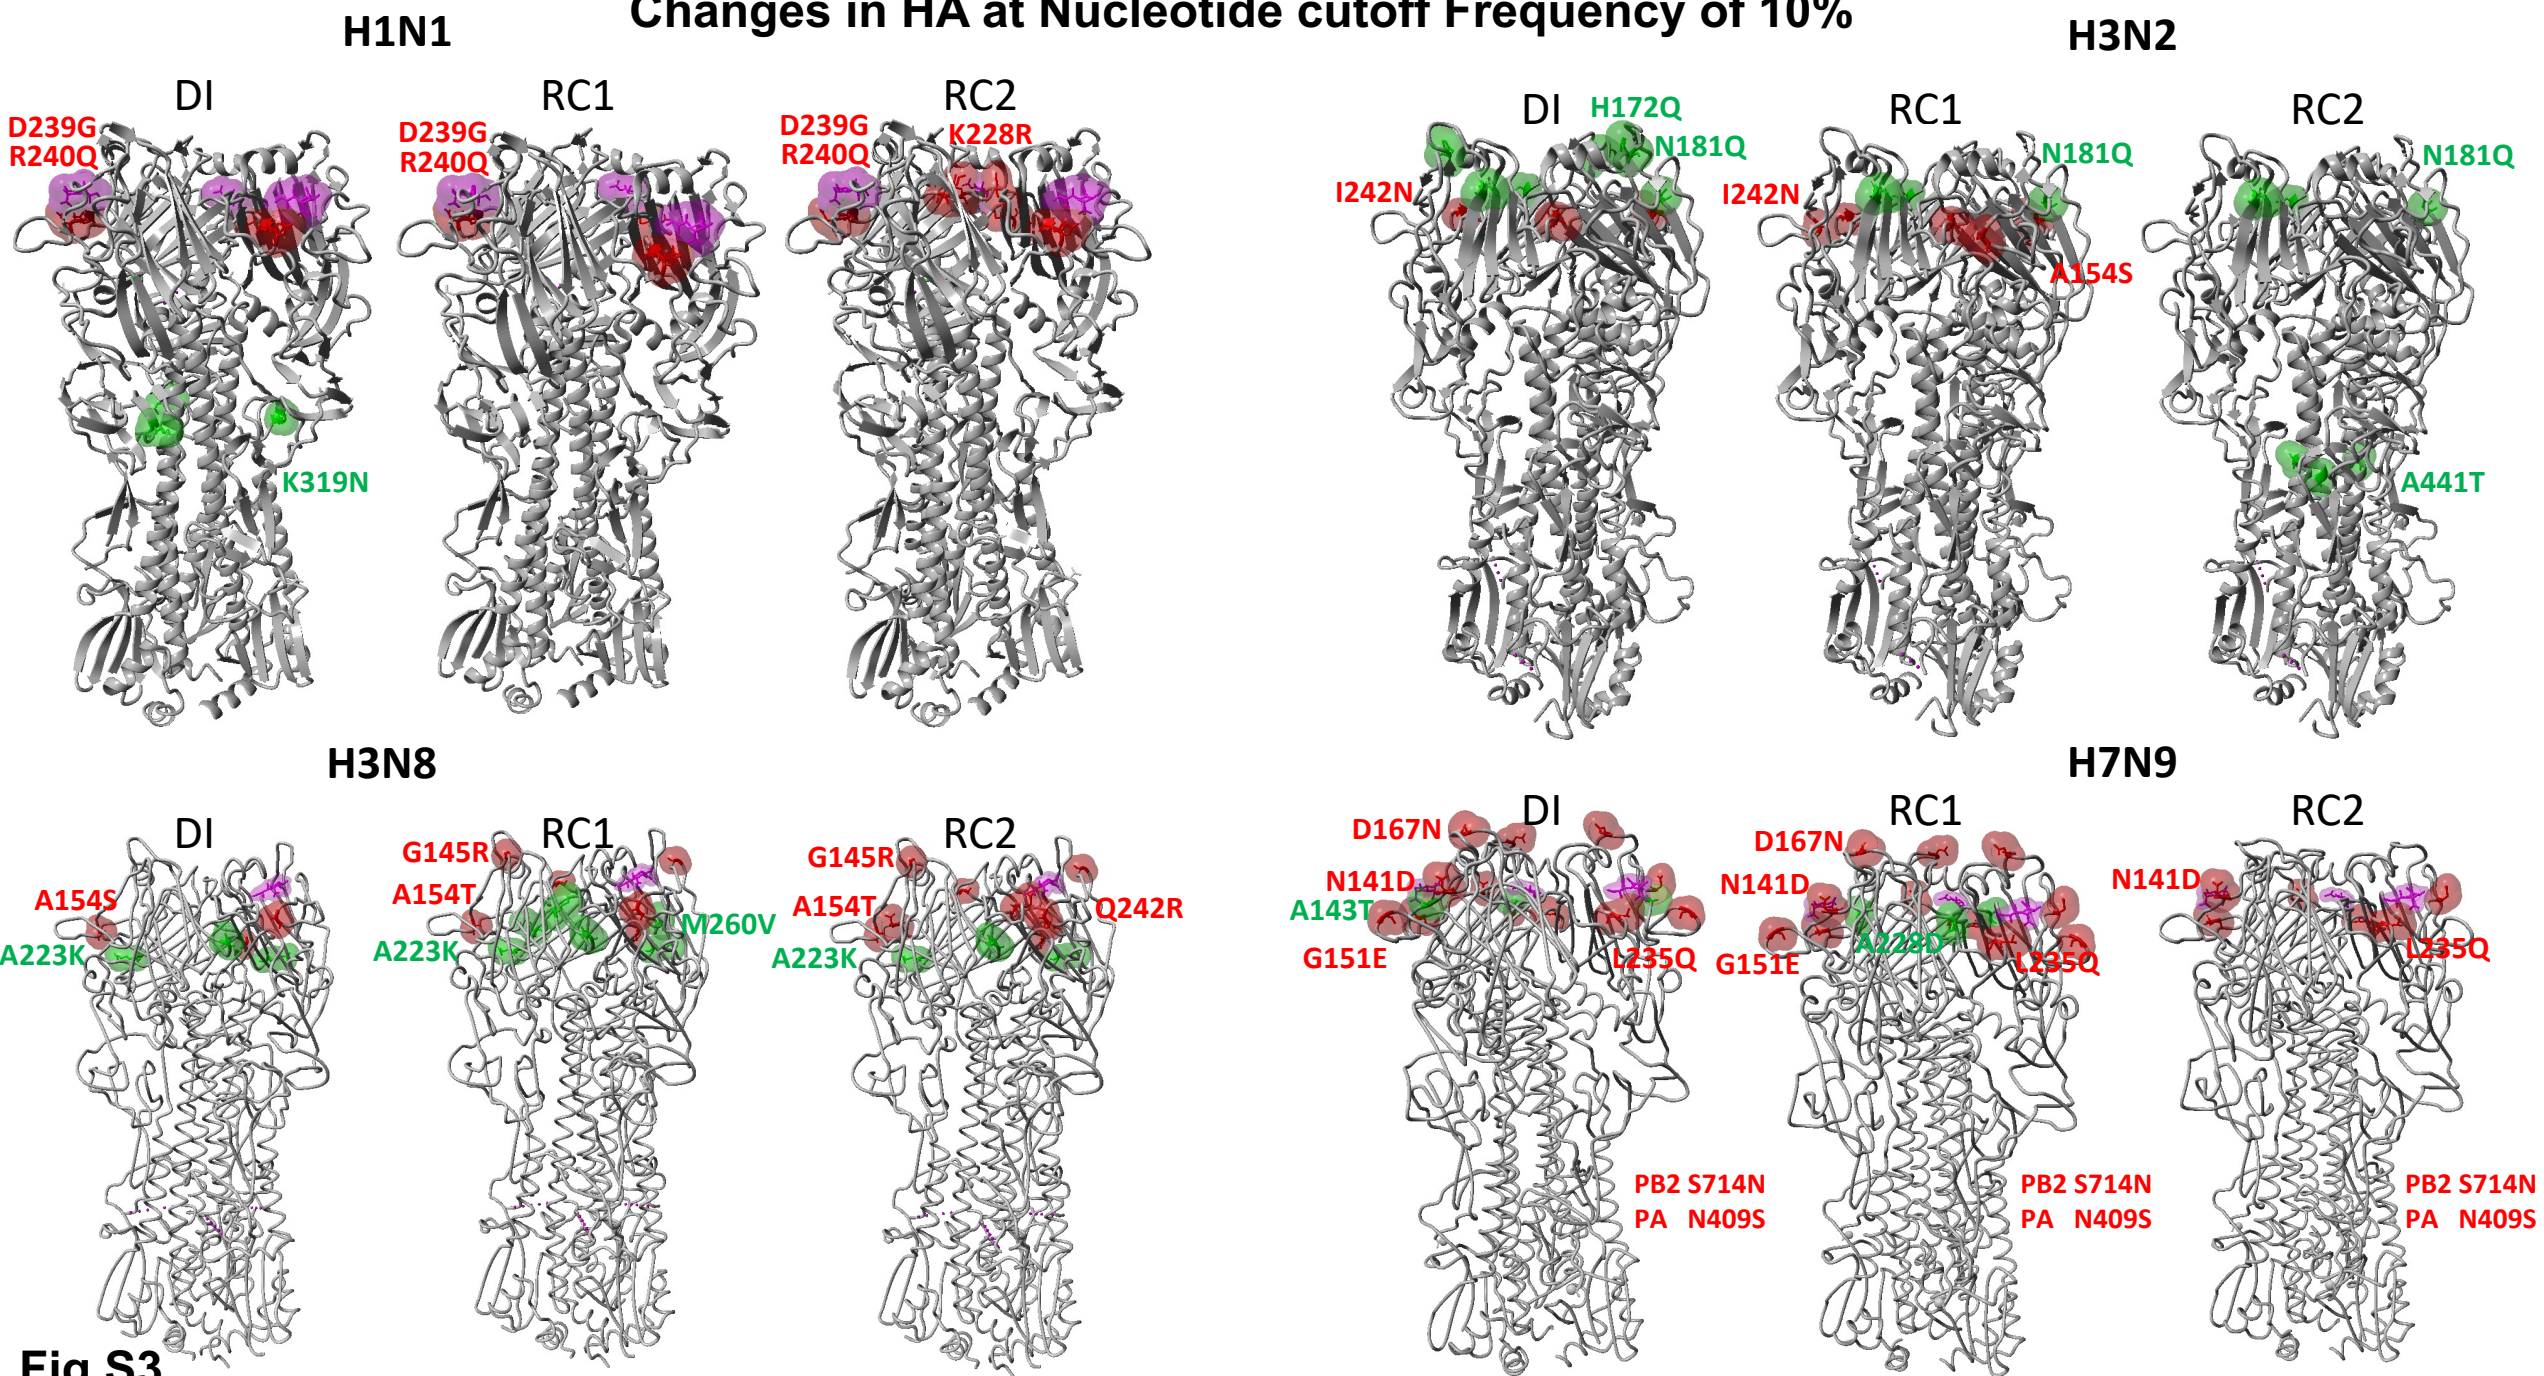

Fig S3

Supplement: mbio.02540-22-s0003.pdf [file mbio.02540-22-s0003.pdf]
